# Supplementary material for: Species Identification of Caviar Based on Multiple DNA Barcoding
Source: MDPI journal article supplement (doi:10.3390/molecules28135046), 2023-06-28
Supplement: s1 [file s1]

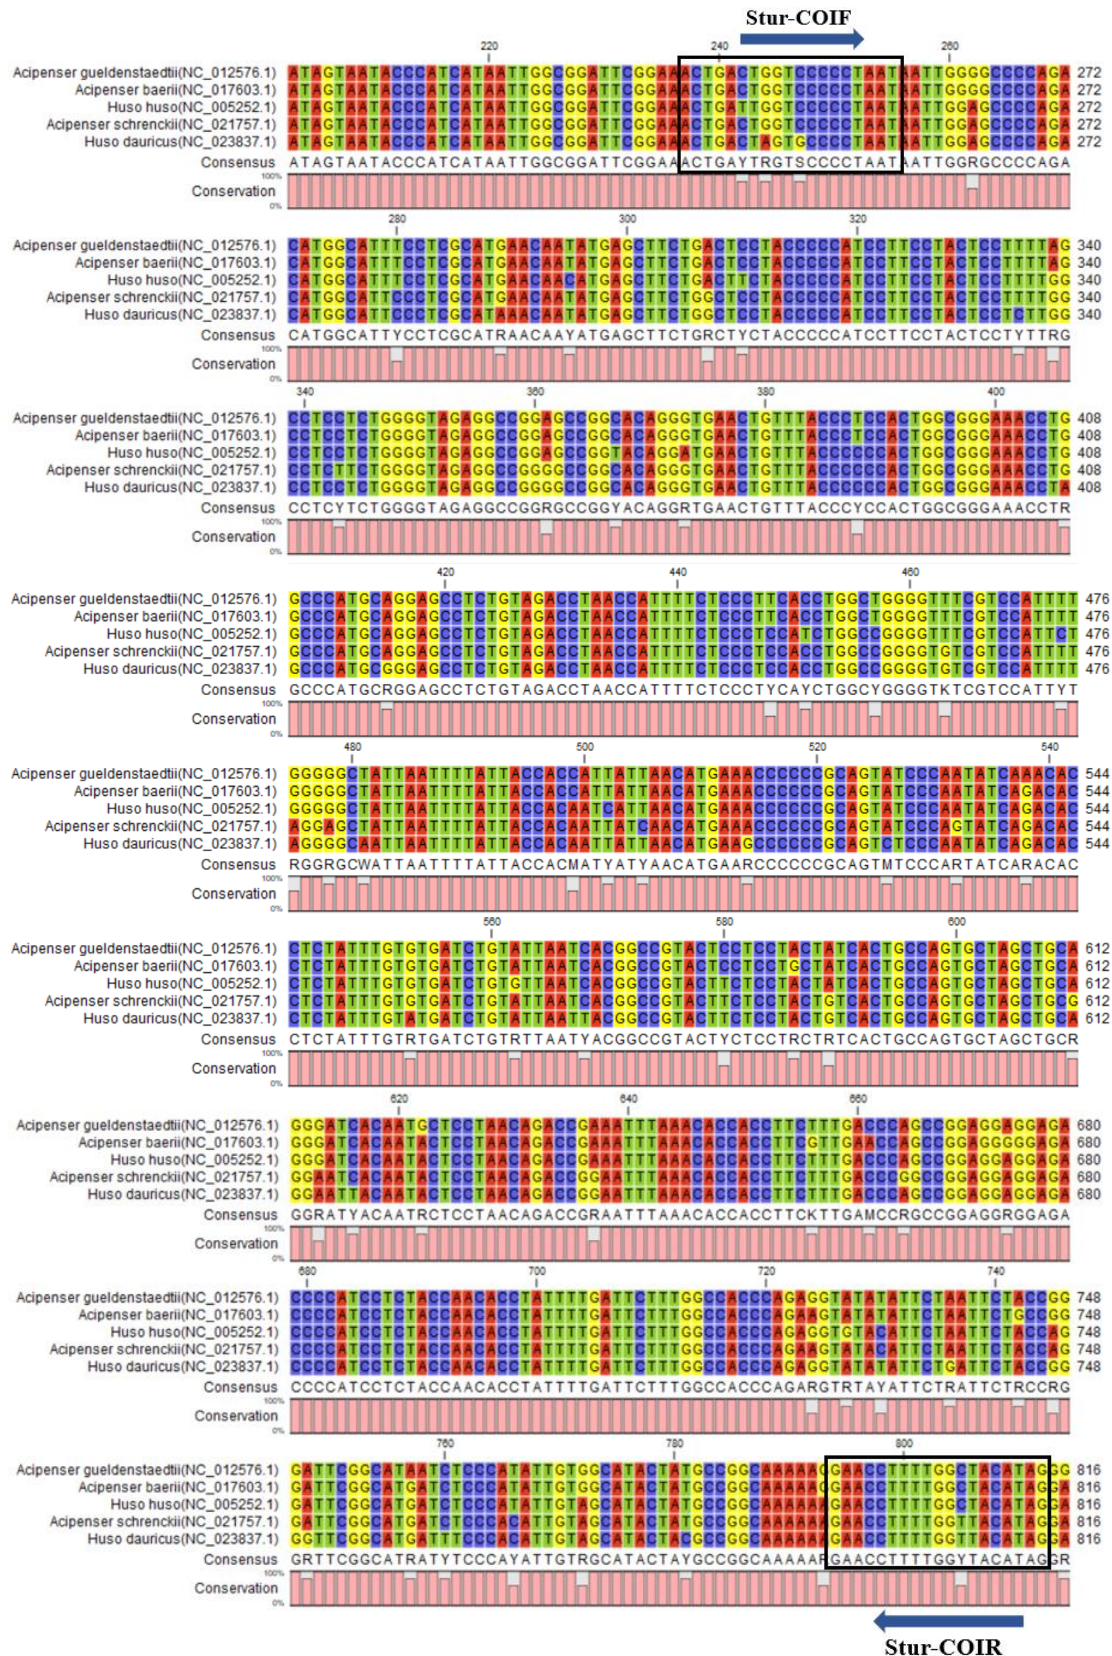

(a)

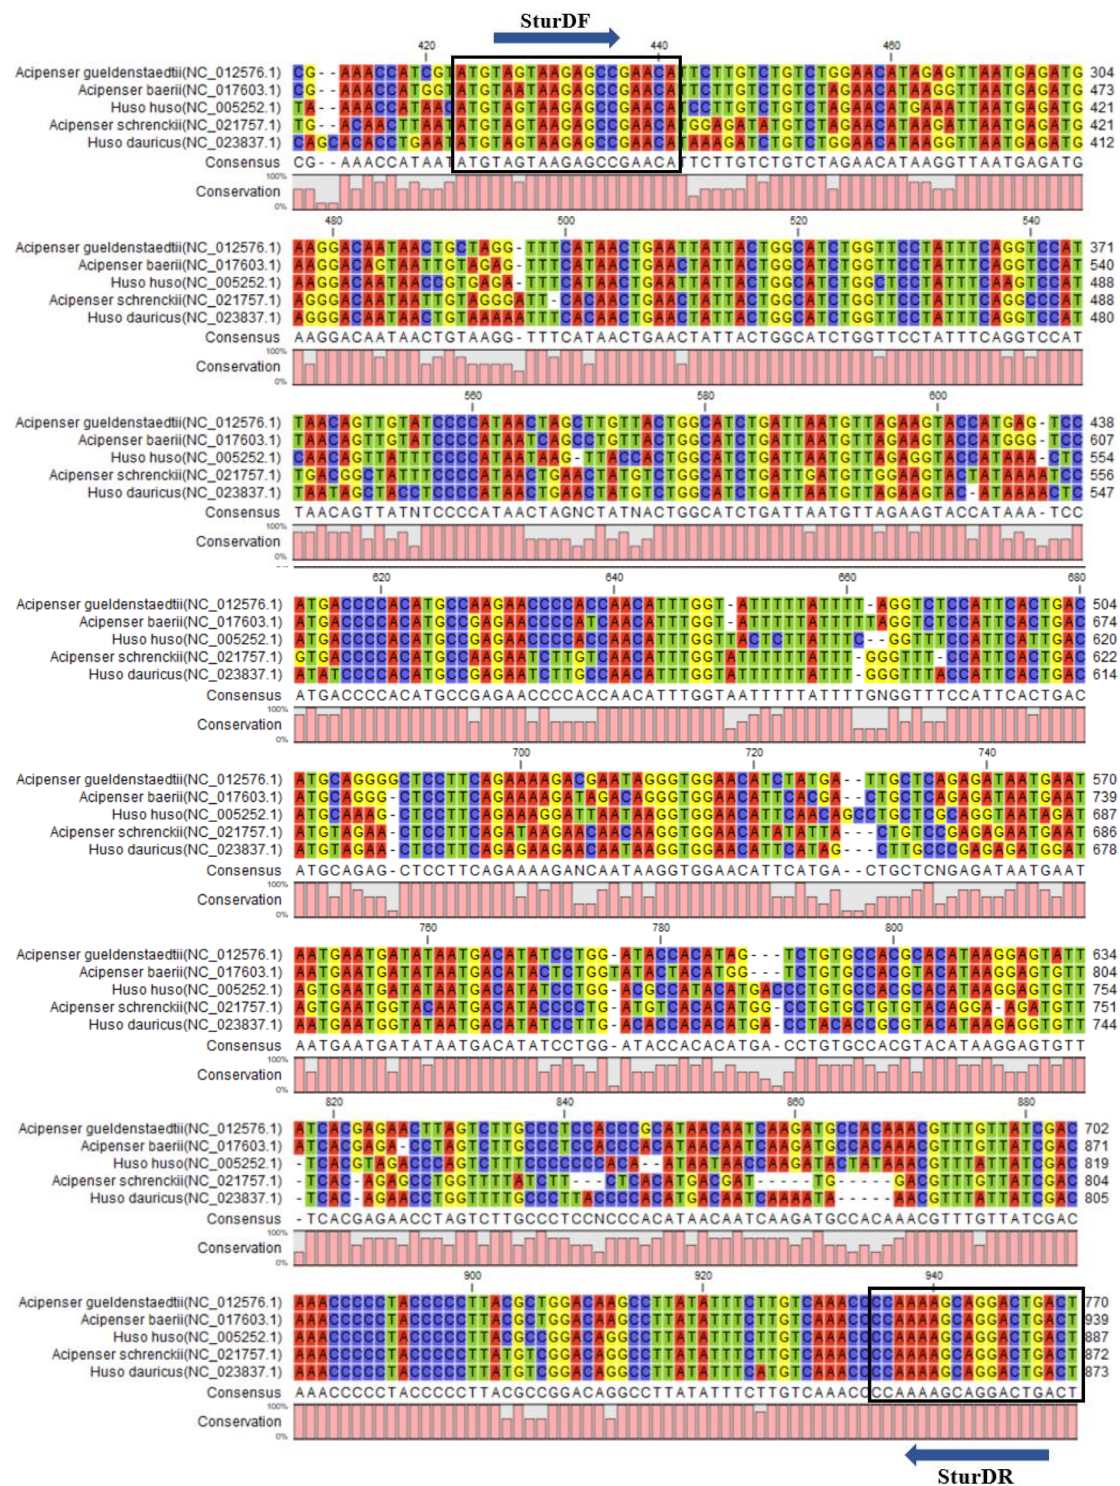

(b)

**Figure S1.** Sequence alignment of *COI* (a) and *D-loop* (b) primer designs. Using CLC Genomics Workbench 8.5, the *COI* and *D-loop* gene sequences of sturgeon were compared, and the conserved regions with significant differences in their sequences were selected to design primers.
